# Supplementary material for: Genome-wide polygenic risk score method for diabetic kidney disease in patients with type 2 diabetes
Source: bioRxiv or medRxiv preprint supplement (doi:10.1101/2021.07.09.21260114), 2021-07-10
Supplement: Supplementary file [file media-1.pdf]

## **SUPPLEMENTARY METHODS**

### **Imputation and Quality Control:**

In the UKBB, imputation was performed using the Haplotype Reference Consortium (HRC) combined with UK10K haplotype resource, leading to ~96 million variants available in the latest released imputed data version 3. We excluded 152,197 samples belonging to one of these categories: outliers in heterozygosity and missing rates, putative sex chromosome aneuploidy, self-reported non-white British ancestry, and related individuals. We excluded related individuals as one individual in each pair with relatedness up to the third degree. This led to a subsample of 335,212 individuals with available genotypic and phenotypic data.

In BioMe, we performed quality control of the Global Screening Array data for N=32,595 participants and n=635,623 variants stratified by ethnicity category (African American=7794, European American=10133, Hispanic American=1172, and Other=3496). Individuals with a ethnicity-specific heterozygosity rate that surpassed +/- six standard deviations of the population-specific mean, along with individuals with a call rate of  $\leq 95\%$  were removed (N=684 participants in total). We then removed 84 individuals exhibiting persistent discordance between EMR recorded and genetic sex. We also removed an additional 4 individuals with phenotypically indeterminate sex and 158 duplicate individuals were also excluded from downstream analysis. In total 31,911 passed sample level QC for downstream analysis. Sites with a call rate below 95% were excluded (n=19253), along with sites that were seen to significantly violate Hardy-Weinberg equilibrium (HWE) when calculated stratified by ancestry. HWE thresholds varied by ethnicity, specifically we set a threshold of  $p < 1 \times 10^{-5}$  in African American and European American, or  $p < 1 \times 10^{-13}$  in Hispanic American (n=11,503 SNPs in total). This resulted in the retention of n=604,869 sites. Imputation of variants was performed using the 1000 Genomes Phase 3 data release as a reference panel. Genotype data which passed the above quality control filters was phased with SHAPEIT2,1 and imputed to 1000 Genomes Phase 3 reference data using IMPUTE version 2.3.2.2. Genome segments known to harbor gross chromosomal anomalies were filtered out of the final genotype probabilities files.

## SUPPLEMENTARY TABLES

**Supplementary Table 1:** Association of npDKD with GPS<sub>eGFR</sub> candidates generated assuming different values of the fraction of causal variants.

| Fraction of causal variants | Odds ratio  | 2.5% CI     | 97.5% CI    | P-value                      | R <sup>2</sup> |
|-----------------------------|-------------|-------------|-------------|------------------------------|----------------|
| 1                           | 1.33        | 1.23        | 1.43        | 5.35×10 <sup>-14</sup>       | 0.059          |
| 0.3                         | 1.34        | 1.24        | 1.44        | 1.08×10 <sup>-14</sup>       | 0.060          |
| 0.1                         | 1.36        | 1.27        | 1.47        | 1.61×10 <sup>-16</sup>       | 0.062          |
| 0.03                        | 1.43        | 1.33        | 1.54        | 3.07×10 <sup>-21</sup>       | 0.066          |
| <b>0.01</b>                 | <b>1.49</b> | <b>1.38</b> | <b>1.60</b> | <b>3.33×10<sup>-26</sup></b> | <b>0.070</b>   |
| 0.003                       | 1.11        | 1.03        | 1.19        | 4.01×10 <sup>-3</sup>        | 0.050          |
| 0.001                       | 1.02        | 0.95        | 1.10        | 6.11×10 <sup>-1</sup>        | 0.049          |
| 0.0003                      | 1.11        | 1.04        | 1.19        | 3.26×10 <sup>-3</sup>        | 0.051          |
| 0.0001                      | 1.13        | 1.05        | 1.21        | 1.13×10 <sup>-3</sup>        | 0.051          |

**Supplementary Table 2:** Association of pDKD with GPS<sub>UACR</sub> candidates generated assuming different values of the fraction of causal variants.

| Fraction of causal variants | Odds ratio  | 2.5% CI     | 97.5% CI    | P-value                     | R <sup>2</sup> |
|-----------------------------|-------------|-------------|-------------|-----------------------------|----------------|
| 1                           | 1.08        | 1.03        | 1.12        | 3.35×10 <sup>-4</sup>       | 0.0058         |
| 0.3                         | 1.08        | 1.03        | 1.12        | 3.36×10 <sup>-4</sup>       | 0.0058         |
| 0.1                         | 1.08        | 1.03        | 1.12        | 3.32×10 <sup>-4</sup>       | 0.0058         |
| 0.03                        | 1.08        | 1.03        | 1.12        | 3.20×10 <sup>-4</sup>       | 0.0059         |
| 0.01                        | 1.08        | 1.04        | 1.12        | 2.98×10 <sup>-4</sup>       | 0.0059         |
| <b>0.003</b>                | <b>1.08</b> | <b>1.04</b> | <b>1.13</b> | <b>1.81×10<sup>-4</sup></b> | <b>0.0060</b>  |
| 0.001                       | 1.08        | 1.03        | 1.12        | 4.52×10 <sup>-4</sup>       | 0.0058         |
| 0.0003                      | 1.06        | 1.02        | 1.10        | 6.88×10 <sup>-3</sup>       | 0.0053         |
| 0.0001                      | 1.06        | 1.01        | 1.10        | 7.52×10 <sup>-3</sup>       | 0.0053         |

**Supplementary Table 3:** Association of DKD with  $GPS_{DKD}$  candidates generated assuming different values of the fraction of causal variants.

| Fraction of causal variants | Odds ratio  | 2.5% CI     | 97.5% CI    | P-value        | R <sup>2</sup> |
|-----------------------------|-------------|-------------|-------------|----------------|----------------|
| 1                           | 1.06        | 1.03        | 1.10        | 0.0010         | 0.012          |
| 0.3                         | 1.06        | 1.02        | 1.10        | 0.0013         | 0.012          |
| 0.1                         | 1.06        | 1.02        | 1.10        | 0.0013         | 0.012          |
| 0.03                        | 1.06        | 1.03        | 1.10        | 0.0011         | 0.012          |
| <b>0.01</b>                 | <b>1.07</b> | <b>1.03</b> | <b>1.11</b> | <b>0.00076</b> | <b>0.012</b>   |
| 0.003                       | 1.04        | 1.00        | 1.08        | 0.052          | 0.011          |
| 0.001                       | 1.01        | 1.00        | 1.05        | 0.44           | 0.011          |
| 0.0003                      | 1.01        | 0.97        | 1.05        | 0.60           | 0.011          |
| 0.0001                      | 1.02        | 0.99        | 1.06        | 0.19           | 0.011          |
